# Supplementary material
Source: publisher site journal article supplement (https://www.dovepress.com/article/280535)
Supplement: Supplementary file 1 [file get_supplementary_file.php]

**Supplementary Appendix 1.**

**Supplementary Materials and Methods.**

***Inclusion Criteria***

(1) Provided written informed consent.

(2) Patients between 18 and 75 years of age with Eastern Cooperative Oncology Group (ECOG) Score of ≤ 3.

(3) Histologically confirmed CD19+ diffuse large B-cell lymphoma (DLBCL), mantle cell lymphoma (MCL), or transformed follicular lymphoma (tFL) at last relapse.

• Confirmed by central pathology review before enrollment.

• Sufficient formalin-fixed, paraffin-embedded (FFPE) tumor samples were required for histological, molecular subtype testing.

• Relapsed/refractory DLBCL and tFL after ≥2 lines of chemotherapy, including rituximab and anthracycline.

• Relapsed/refractory MCL after ≥2 lines of therapy that includes immunochemotherapy and ibrutinib, or not agree to receive ibrutinib treatment.

• Patients had failure with, be ineligible for, or not consent to auto-hematopoietic stem-cell transplantation (HSCT).

• At least one measurable tumor.

(4) Life expectancy ≥12 weeks.

(5) Included the following laboratory values:

• an absolute neutrophil count > 1000 mm-3, platelets count ≥ 45,000 mm-3, and hemoglobin > 8.0g dL-1.

• alanine aminotransferase and aspartate aminotransferase ≤ 2.5 × the upper limit of the normal range (ULN), and total bilirubin ≤ 2.0 mg dL-1.

• a serum creatinine of ≤ 1.5 × ULN.

• a left ventricular ejection fraction ≥50%.

***Exclusion Criteria***

(1) Prior treatment: including CD19-targeted therapy, CAR-T cell therapy, gene therapy, and allogenic HSCT.

(2) Chemotherapy other than lymphodepleting chemotherapy, therapeutic doses of steroids, immunosuppressive agent, lenalidomide, bortezomib, ibrutinib, or any radiation therapy within 2 weeks before leukapheresis.

(3) Investigational drug within 4 weeks before screening.

(4) Active replication of prior infection within hepatitis B (HBV DNA >103) or active hepatitis C (HCV RNA positive).

(5) HIV-positive.

(6) Active infection.

(7) Previous or concurrent cancer except in the case of adequately treated skin basal cell carcinoma or cervix cancer.

(8) Currently pregnant or refusal to practice birth control within 1 years.

(9) Active neurological autoimmune or inflammatory disorders.

***Manufacture of the*** ***CD19 /41BB-CART cells***

Autologous peripheral blood mononuclear cells (PBMCs) were collected on a COBE Spectra apheresis instrument (Terumo BCT, Lakewood Colorado, USA). Fresh or thawed PBMCs were suspended in AIM V medium (Gibco, Grand Island, NewYork, USA) with 10% human AB serum (Sigma, St. Louis, MO, USA) and 300 international units (IU)/mL interleukin-2 (IL-2) for incubation in a 37℃, 5% CO2 humidified incubator. After 6 hours, adherent cells were removed, and then suspension cells were cultured for 24 hours with AIM V medium containing IL-2 (300 IU/ml), 5 ng/mL IL-7 and IL-15 (Prime Gene, Shanghai, China), as well as anti-CD3 and CD28 dynabeads (Gibco) with the ratio of 1: 1 for activating T cells. Next, anti-CD19 /41BB vector were used to infect the activated T-cells, meanwhile polybrene (8 μg/ml) was added to increase viral transduction. The transduction process was stopped day 2 by resuspending cells in fresh complete medium supplemented with IL-2, IL-7, and IL-15. The CAR-T cell products were harvested on day 13-15. Release tests of CAR-T cell products manufactured under GMP included viability, endotoxin, potency, stability, and microbiological testing.

The DNA sequences of the scFv domain targeting the CD19 were derived from clone FMC63. The CAR.19-CD137ζ vector harboring anti-CD19 scFv, and human 4-1BB and CD3ζ signaling domains were generated. The cassette was cloned into a human EF-1α promoter expressed lentiviral plasmid vector. A pseudotyped, clinical-grade lentiviral vector was produced according to current good manufacturing practices with a three-plasmid production approach. CD19-CAR-T cells in this study are manufactured according to Good Manufacturing Practices in the Insititute of Hematology, Zhejiang University.

***Real-time quantitative PCR***

Real-time quantitative PCR (qPCR) was used to determine the percentage of CD19-CAR+ T cells in the peripheral blood of patients. Briefly, DNA was extracted from PBMCs of each patient at different time points after CAR-T infusion using QIAamp DNA Blood Mini Kit (QIAGEN, Redwood City, California, USA), and then amplified with a primer and probe set that was specific for the CD19-CAR. The standard curves were made by a serial 1:5 dilutions of DNA from the infused CAR-T production of each patient into pre-infusion DNA from the same patient. The percentage of the infused CAR-T cells that expressed the anti-CD19 CAR was determined by flow cytometry as mentioned above. The standard curve was in units of % CAR+ cells. The highest point of the standard curve was the point derived from undiluted infused T-cell DNA. The percentage of PBMC carrying CAR gene at each time-point was determined by comparing the qPCR results obtained with DNA of PBMC from each time-point to the qPCR results obtained from each patient’s Infused-T-cell standard curve. Real-time qPCR was performed using the C1000TM Thermal Cycler (Bio-Rad, Hercules, California, USA), and all samples were normalized to β-actin. After the percentage of CAR+ PBMC was determined by PCR, the absolute number of CAR+ PBMC was calculated by multiplying the percentage of CAR+ PBMC by the sum of the absolute number of lymphocytes and monocytes in peripheral blood. The sequence-specific primers and probes used in this study were as follows: anti-CD19 CAR forward 5'-TATCGCCACCTATTTCTGCCAG-3' and reverse 5'- TTTCCTGCAGCTTCACTTCG -3'; probe for anti-CD19 CAR reverse 5’-(FAM)- ACCTTTGGCGGCGGCACCAAGCTGGA -(BHQ1)-3’; Human β-actin forward 5’-CCACCATGTACCCTGGCATT and reverse 5’-CGGACTCGTCATACTCCTGC-3’, probe for human β-actin reverse 5’-(HEX)- CCTGGCCTCGCTGTCCACCTTCCA -(BHQ1)-3’.
